# Supplementary material for: Synergistic ligand effect for the construction of titanium–oxo clusters with planar chirality and high solution stability
Source: Royal Society of Chemistry journal article supplement (doi:10.1039/d0dt00197j), 2020-01-01
Supplement: d0dt00197j1.pdf [file d0dt00197j1.pdf]

## Supporting Information

### Synergistic ligands effect for the construction of titanium-oxo clusters with planar chirality and high solution stability

Qing-Rong Ding,<sup>a</sup> Gui-Lan Xu,<sup>a</sup> Jian Zhang<sup>a</sup> and Lei Zhang<sup>\*a</sup>

<sup>a</sup>State Key Laboratory of Structural Chemistry, Fujian Institute of Research on the Structure of Matter,  
Chinese Academy of Sciences, Fuzhou, Fujian 350002, P. R. China.

E-mail: [LZhang@fjirsm.ac.cn](mailto:LZhang@fjirsm.ac.cn)

#### Content

|                                                                             |     |
|-----------------------------------------------------------------------------|-----|
| 1. Materials and Methods                                                    | S2  |
| 2. Syntheses                                                                | S2  |
| 3. Structural information and physical characterization of PTC-67 to PTC-70 | S3  |
| 4. General Methods for X-ray Crystallography                                | S10 |
| 5. A summary of crystallography data for PTC series                         | S11 |
| 6. References                                                               | S14 |

## 1. Materials and Methods

All reagents and solvents employed are commercially available and are used as received without further purification. Dimethylglyoxime was bought from Alfa Aesar.  $\text{Ti}(\text{O}^i\text{Pr})_4$  (96%) and diphenic acid were bought from Admas-beta. Cis-4-cyclohexene-1,2-dicarboxylic acid and phthalic acid were bought from Aladdin. The phase purity of products were confirmed by PXRD using a Rigaku Dmax2500 diffractometer with Cu  $K\alpha$  radiation ( $\lambda = 1.54056 \text{ \AA}$ ) with a step size of  $5^\circ/\text{min}$ . Thermogravimetric analyses (TGA) were performed using a NETSCHZ STA-449C thermoanalyzer with a heating rate of  $10^\circ\text{C}/\text{min}$  under a nitrogen atmosphere. Fourier transform infrared (FT-IR) spectra were recorded with a Spectrum One FT-IR Spectrometer in the  $400\text{--}4000 \text{ cm}^{-1}$  range. The UV-vis diffuse reflection data were recorded at room temperature using a powder sample with  $\text{BaSO}_4$  as a standard on a Perkin-Elmer Lambda950 UV-vis spectrophotometer and scanned at  $200\text{--}800 \text{ nm}$  in the reflectance mode with application of the Kubelka-Munk equation,  $(F(R) = (1-R)^2/2R)$ ,<sup>1</sup> where R representing the reflectance. The elemental analyses were performed on an EA1110 CHNS-O CE elemental analyzer.

## 2. Syntheses

### Synthesis of PTC-67

Dimethylglyoxime (0.035 g, 0.3 mmol), Diphenic acid (0.048 g, 0.2 mmol), and isopropyl alcohol (6 ml) were mixed at room temperature and then dropwise  $\text{Ti}(\text{O}^i\text{Pr})_4$  (0.5 ml, 1.56 mmol) was added. The resultant solution was heated at  $80^\circ\text{C}$  for three days in a glass vial with a polyethylene screw cap. After cooling to and kept at room temperature for a week, pale yellow rodlike crystals of **PTC-67** were obtained (yield: 80% based on Dimethylglyoxime). EA (%) calculated for  $\text{C}_{67}\text{H}_{126}\text{N}_4\text{O}_{29}\text{Ti}_8$  (1834.70): C, 43.86; H, 6.92; N, 3.05. Found: C, 43.45; H, 6.73; N, 3.14. FT-IR (KBr pellet,  $\text{cm}^{-1}$ ): 2975(m), 2916(w), 2857(w), 2358(w), 1605(m), 1533(m), 1445(w), 1376(s), 1327(m), 1132(s), 1073(m), 1014(m), 985(s), 958(s), 858(s), 760(s), 701(m), 672(m), 592(s), 564(s), 457(m).

### Synthesis of PTC-68

Dimethylglyoxime (0.035 g, 0.3 mmol), Diphenic acid (0.048 g, 0.2 mmol), and isopropyl alcohol (6 ml) were mixed at room temperature and then dropwise  $\text{Ti}(\text{O}^i\text{Pr})_4$  (0.5 ml, 1.56 mmol) was added. The resultant solution was heated at  $100^\circ\text{C}$  for one day in a glass vial with a polyethylene screw cap. After cooling to and kept at room temperature for a week, yellow block crystals of **PTC-68A** and **PTC-68B** were obtained (yield: 70% based on Dimethylglyoxime). EA (%) calculated for  $\text{C}_{62}\text{H}_{110}\text{N}_6\text{O}_{30}\text{Ti}_9$  (1850.65): C, 40.24; H, 5.99; N, 4.54. Found: C, 40.39; H, 6.08; N, 4.47. FT-IR (KBr pellet,  $\text{cm}^{-1}$ ): 2975(m), 2916(w), 2857(w), 2358(w), 1605(m), 1546(m), 1448(w), 1390(s), 1331(m), 1135(s), 1087(m), 969(s), 842(m), 773(s), 679(m), 619(s), 538(s), 460(m).

### Synthesis of PTC-69

Dimethylglyoxime (0.035 g, 0.3 mmol), Cis-4-cyclohexene-1,2-dicarboxylic acid (0.034 g, 0.2 mmol), and isopropyl alcohol (6 ml) were mixed at room temperature and then dropwise  $\text{Ti}(\text{O}^i\text{Pr})_4$  (0.5 ml, 1.56 mmol) was added. The resultant solution was heated at  $100^\circ\text{C}$  for three days in a glass vial with a polyethylene screw cap. After cooling to and kept at room temperature for a week, yellow rodlike crystals of **PTC-69** were obtained (yield: 82% based on Dimethylglyoxime). EA (%) calculated for  $\text{C}_{56}\text{H}_{110}\text{N}_6\text{O}_{30}\text{Ti}_9$  (1778.30): C, 37.82; H, 6.23; N, 4.73. Found: C, 37.94; H, 6.43; N, 4.67. FT-IR (KBr pellet,  $\text{cm}^{-1}$ ): 2968(m), 2919(w), 2857(w), 2352(w), 1608(m), 1549(m), 1432(m), 1360(m), 1324(m), 1129(s), 1080(s), 1010(s), 962(s), 855(m), 800(s), 770(s), 692(w), 643(m), 594(s), 555(s), 438(w).

### Synthesis of PTC-70

Dimethylglyoxime (0.035 g, 0.3 mmol), Phthalic acid (0.033 g, 0.2 mmol), and isopropyl alcohol (6 ml) were mixed at room temperature and then dropwise  $\text{Ti}(\text{O}^i\text{Pr})_4$  (0.5 ml, 1.56 mmol) was added. The resultant solution was heated at 100 °C for three days in a glass vial with a polyethylene screw cap. After cooling to and kept at room temperature for a week, yellow rodlike crystals of **PTC-70** were obtained (yield: 60% based on Dimethylglyoxime). EA (%) calculated for  $\text{C}_{56}\text{H}_{106}\text{N}_6\text{O}_{30}\text{Ti}_9$  (1774.26): C, 37.91; H, 6.02; N, 4.74. Found: C, 37.84; H, 6.31; N, 4.60. FT-IR (KBr pellet,  $\text{cm}^{-1}$ ): 2968(m), 2929(w), 2860(w), 2360(w), 1597(m), 1559(s), 1382(s), 1363(s), 1324(m), 1135(s), 1078(s), 998(s), 959(s), 846(m), 778(s), 650(m), 591(s), 542(s), 462(w).

### 3. Structural information and physical characterization of PTC-67 to PTC-70

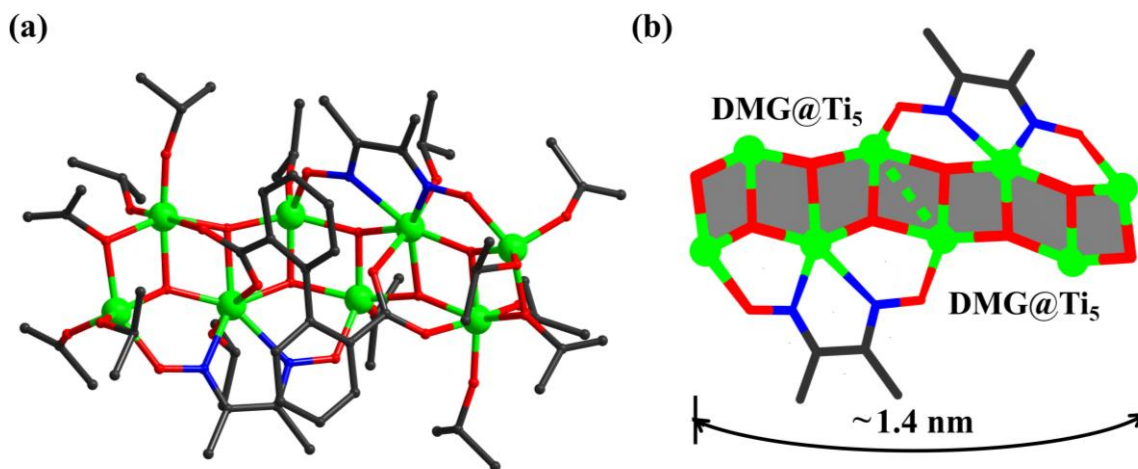

**Figure S1.** (a) The ladder-like  $\text{Ti}_8$  molecular cluster structure of **PTC-67**; (b) the  $\text{Ti}_8$  cluster core structure of **PTC-67** containing two  $\{\text{DMG}@\text{Ti}_5\}$  units. All the H atoms are omitted for clarity. Color codes: green Ti; black C; red O; blue N.

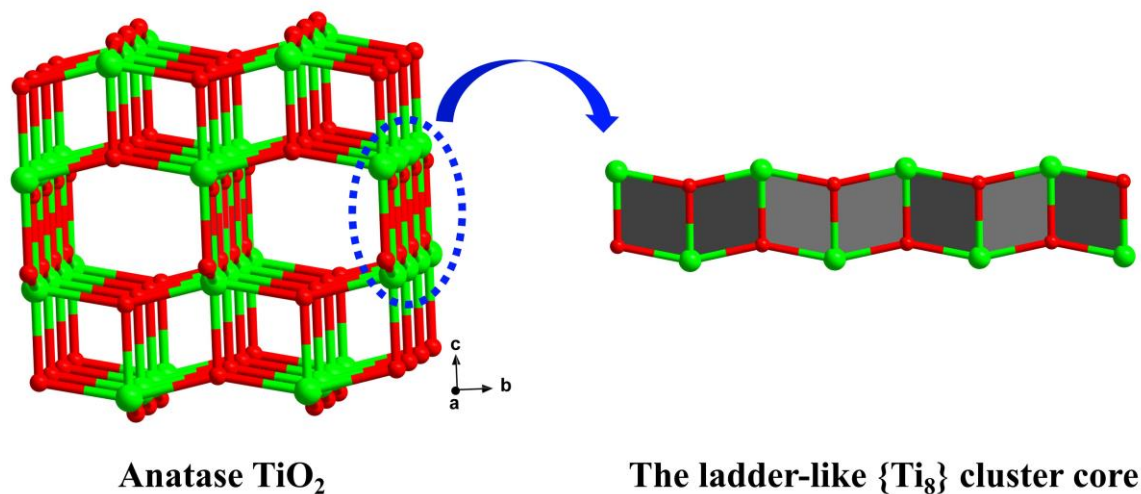

**Figure S2.** The ladder-like  $\text{Ti}_8$  core in anatase  $\text{TiO}_2$ . Color codes: green Ti; red O.

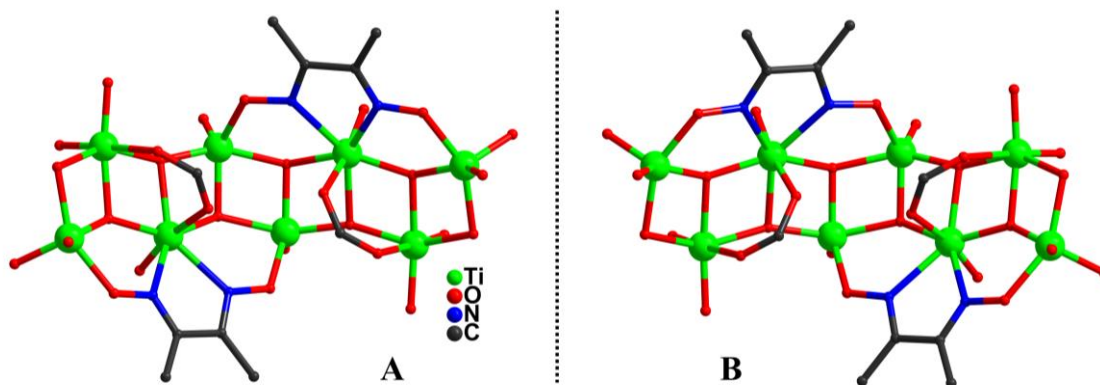

**Figure S3.** Crystal structure of **PTC-67** containing a pair of  $Ti_8$  enantiomers (A and B). Color codes: green Ti; black C; red O; blue N.

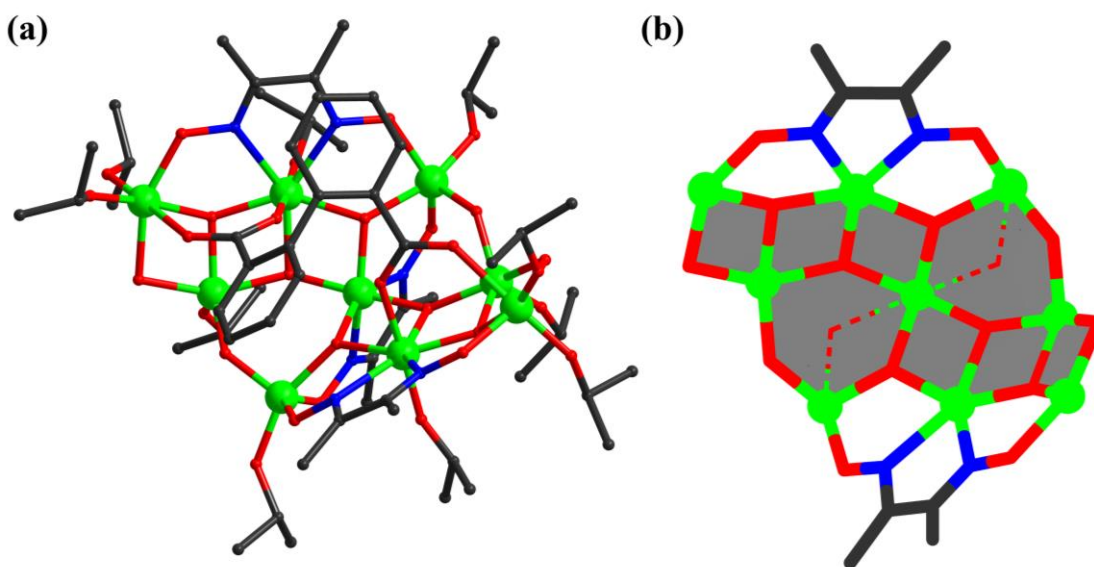

**Figure S4.** (a) The  $Ti_9$  molecular cluster structure of **PTC-68**; (b) the  $Ti_9$  cluster core structure of **PTC-68** containing two  $\{DMG@Ti_5\}$  units. All the H atoms are omitted for clarity. Color codes: green Ti; black C; red O; blue N.

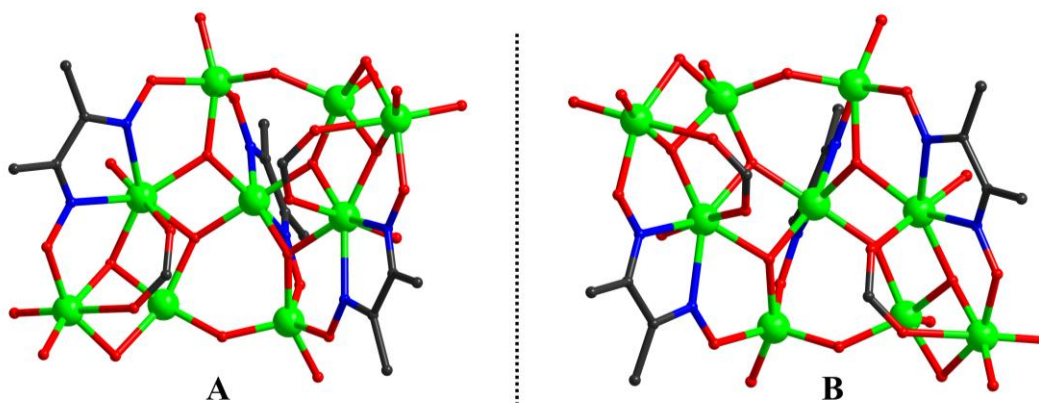

**Figure S5.** Crystal structures of **PTC-68A** and **PTC-68B** containing one of the pair of  $Ti_9$  enantiomers (A and B) respectively. Color codes: green Ti; black C; red O; blue N.

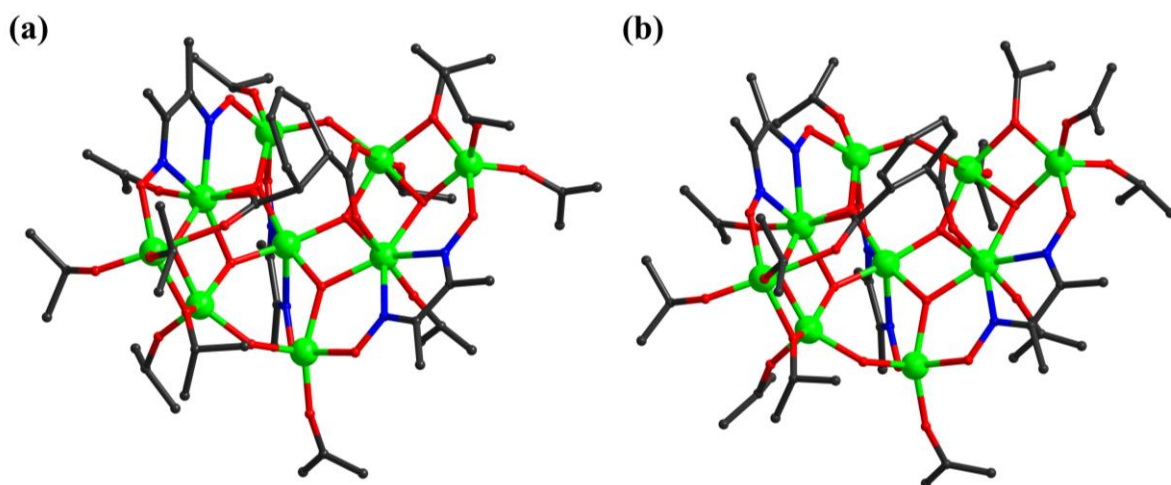

**Figure S6.** The Ti<sub>9</sub> molecular cluster structures of **PTC-69** (a) and **PTC-70** (b). All the H atoms are omitted for clarity. Color codes: green Ti; black C; red O; blue N.

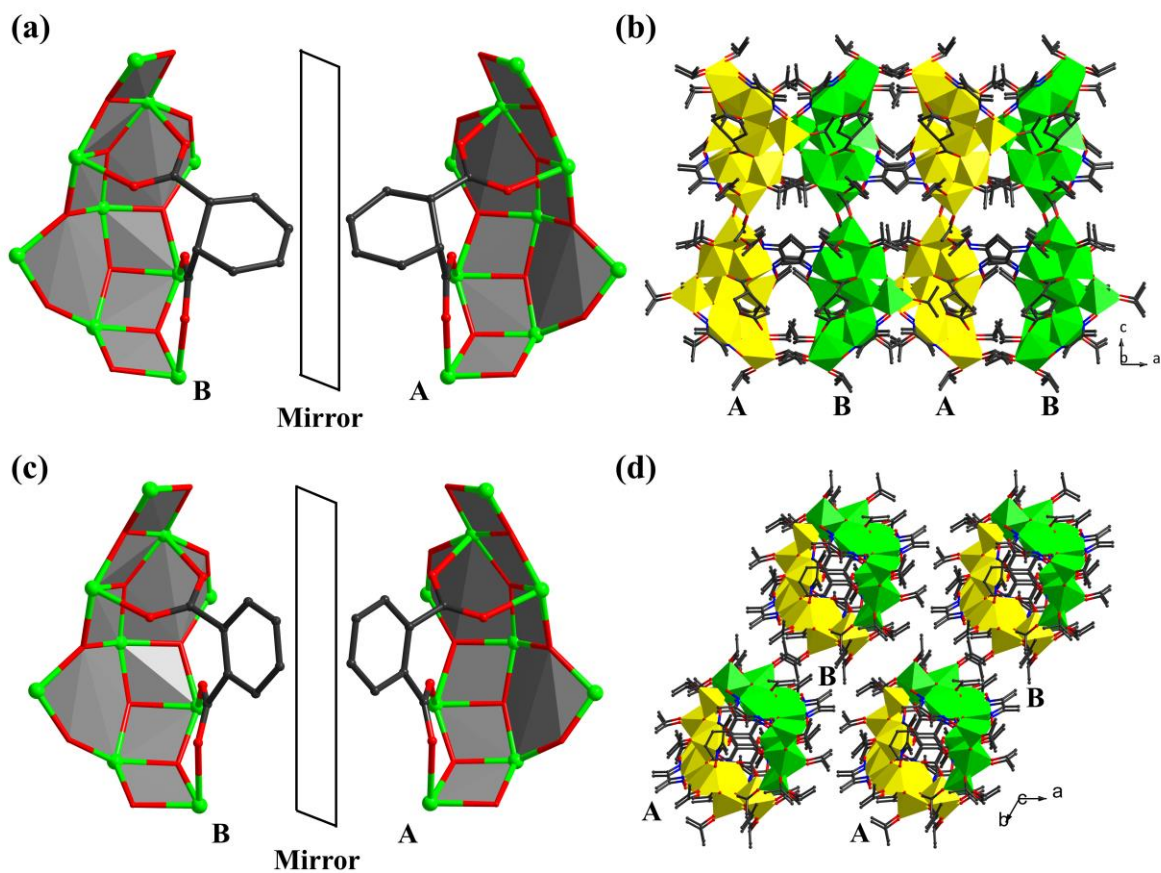

**Figure S7.** (a) A pair of Ti<sub>9</sub> enantiomers in **PTC-69** coordinated by CHDC ligand; (b) the packing structure of **PTC-69**; (c) a pair of Ti<sub>9</sub> enantiomers in **PTC-70** coordinated by PAC ligand; (d) the packing structure of **PTC-70**. All the H atoms are omitted for clarity. Color codes: green Ti; black C; red O; blue N.

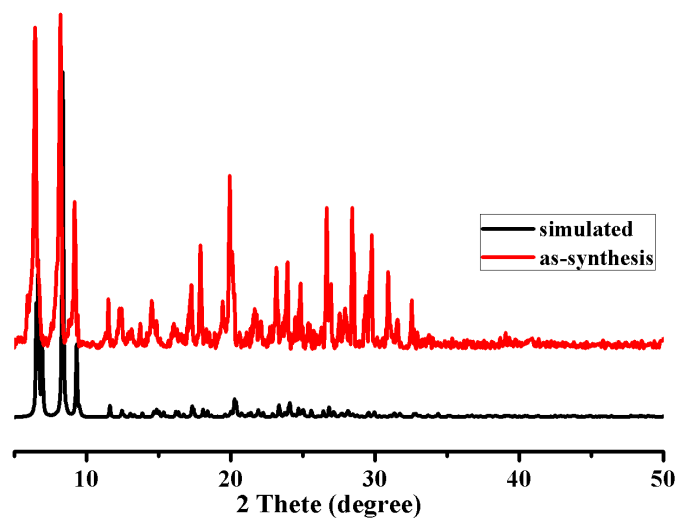

**Figure S8.** The simulated (black) and experimental (red) PXRD patterns of **PTC-67**.

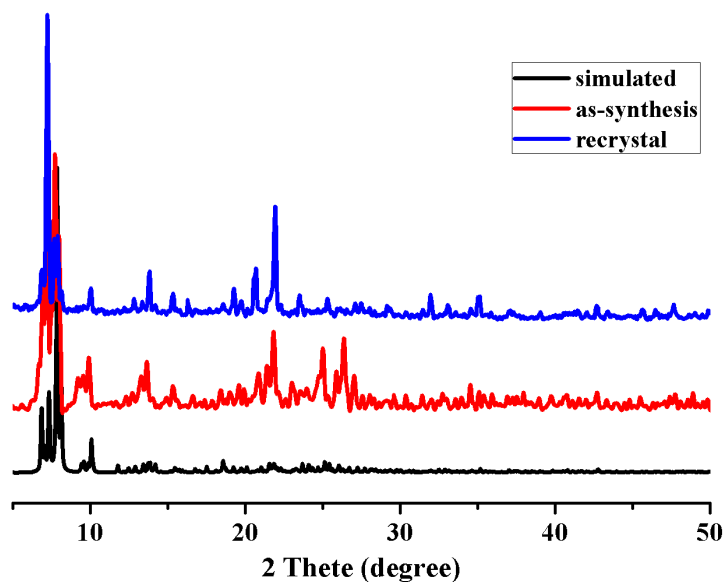

**Figure S9.** The simulated (black), experimental (red) and recrystallized (blue) PXRD patterns of **PTC-68**.

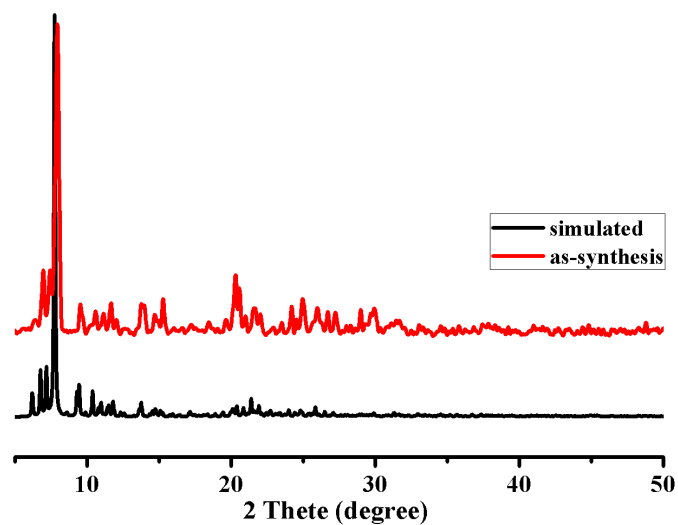

**Figure S10.** The simulated (black) and experimental (red) PXRD patterns of **PTC-69**.

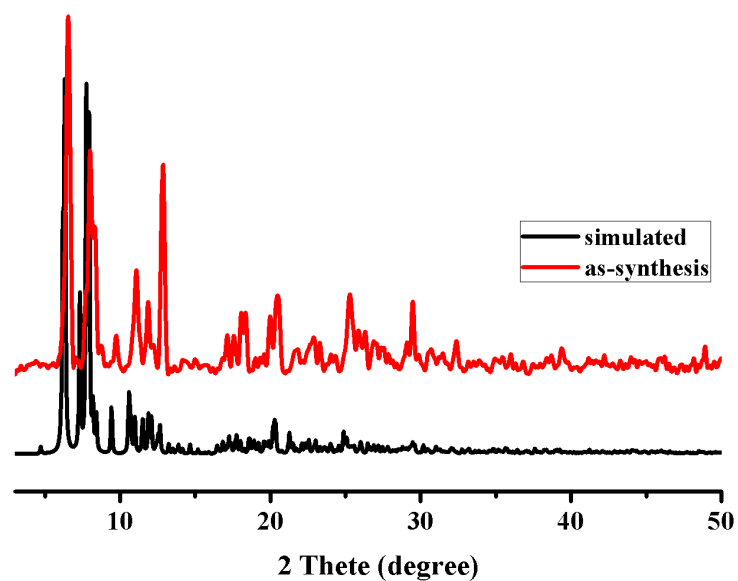

**Figure S11.** The simulated (black) and experimental (red) PXRD patterns of **PTC-70**.

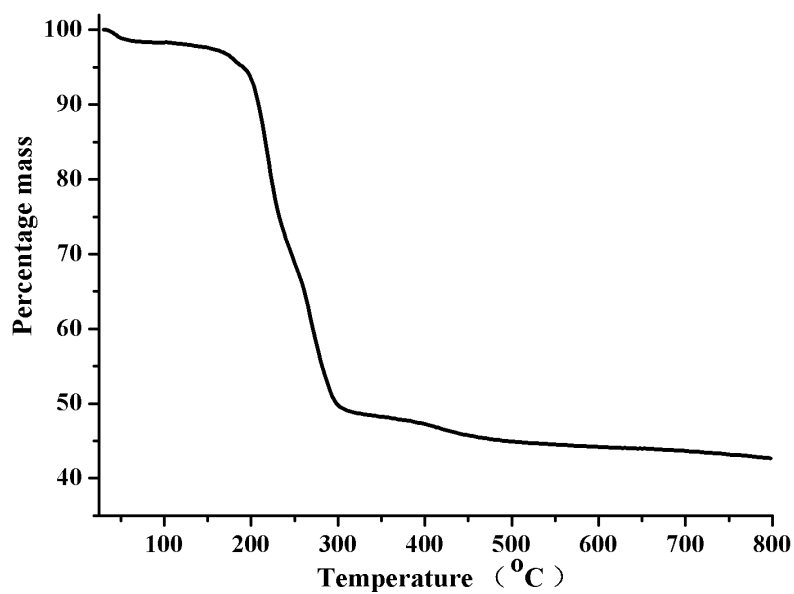

**Figure S12.** TGA curve of **PTC-67**.



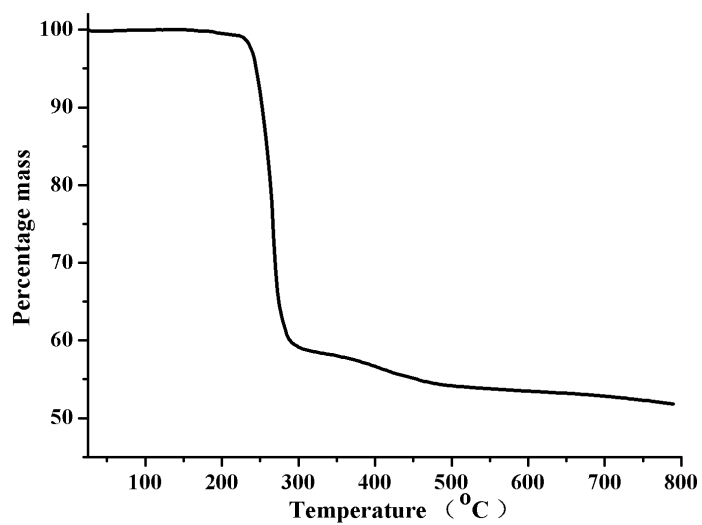

Figure S13. TGA curve of PTC-68.

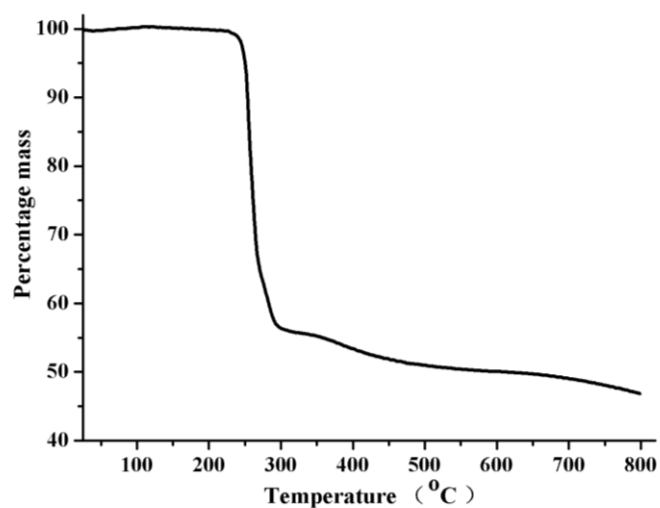

Figure S14. TGA curve of PTC-69.

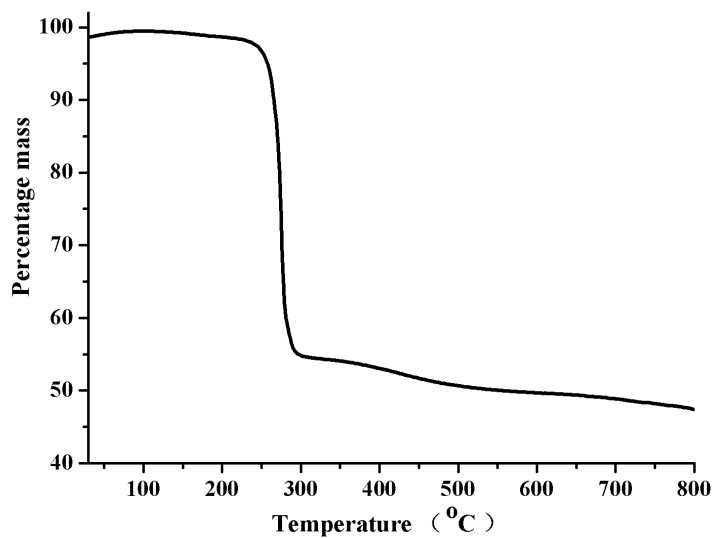

Figure S15. TGA curve of PTC-70.



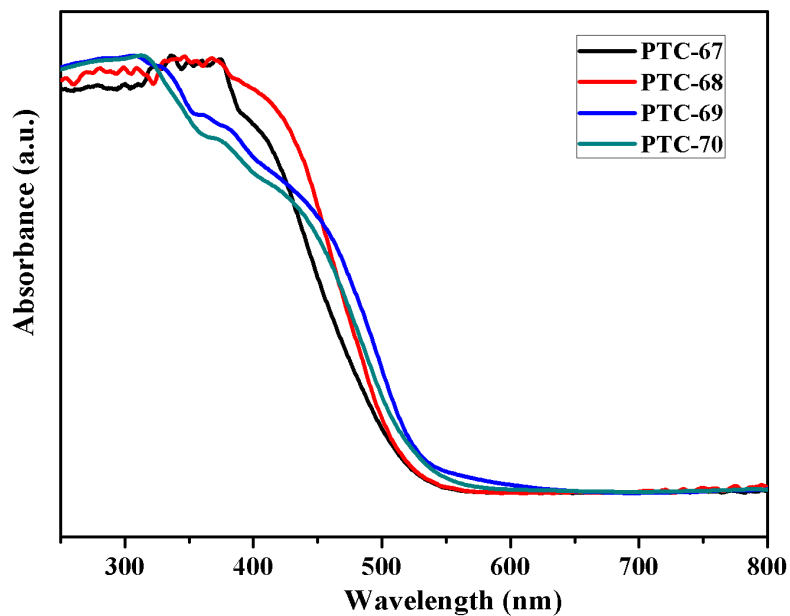

**Figure S16.** Solid state UV-vis absorption spectra of the obtained materials.

**Table S1.** Summary of bandgaps of the reported complexes.

| No. | Complex       | Bandgap | Stabilizing ligand | Bridging ligand                         |
|-----|---------------|---------|--------------------|-----------------------------------------|
| 1   | <b>PTC-67</b> | 2.41    | Dimethylglyoxime   | Diphenic acid                           |
| 2   | <b>PTC-68</b> | 2.36    | Dimethylglyoxime   | Diphenic acid                           |
| 3   | <b>PTC-69</b> | 2.29    | Dimethylglyoxime   | Cis-4-cyclohexene-1,2-dicarboxylic acid |
| 4   | <b>PTC-70</b> | 2.26    | Dimethylglyoxime   | Phthalic acid                           |

#### 4. General Methods for X-ray Crystallography

Crystallographic data of **PTC-68A** and **PTC-70** were collected on a Mercury single crystal diffractometer equipped with graphite-monochromatic Mo K $\alpha$  radiation ( $\lambda = 0.71073 \text{ \AA}$ ) at room temperature. Crystallographic data of **PTC-67** and **PTC-69** were collected on a oxford XCalibur E CCD diffractometer equipped with graphite-monochromatic Mo K $\alpha$  radiation ( $\lambda = 0.71073 \text{ \AA}$ ) at room temperature. While crystallographic data of **PTC-68B** and **PTC-68R** were collected on Supernova single crystal diffractometer equipped with graphite-monochromatic Cu K $\alpha$  radiation ( $\lambda = 1.54178 \text{ \AA}$ ) at 100 K and room temperature. The structures were solved with the dual-direct methods using *ShelxT* and refined with the full-matrix least-squares technique based on  $F^2$  using the *SHELXL-2014*<sup>2</sup>. Non-hydrogen atoms were refined anisotropically, and all hydrogen atoms bond C were generated geometrically. The X-ray crystallographic coordinates for structures reported in this article have been deposited at the Cambridge Crystallographic Data Centre (CCDC) under deposition numbers CCDC 1973835-1973840 for **PTC-67** to **PTC-70**. These data can be obtained free of charge from the Cambridge Crystallographic Data Centre via [http://www.ccdc.cam.ac.uk/data\\_request/cif](http://www.ccdc.cam.ac.uk/data_request/cif).

**5. Supplementary Table S2.** A summary of crystallography data for **PTC-67** to **PTC-70**. More details are given in **Tables S3** and **S4**.

| No. | Complex        | Formula                                                                                             | Sp.<br>Gr.                                      | a(Å)       | b(Å)       | c(Å)       | $\alpha$ (°) | $\beta$ (°) | $\gamma$ (°) | V(Å <sup>3</sup> ) | Flack     |
|-----|----------------|-----------------------------------------------------------------------------------------------------|-------------------------------------------------|------------|------------|------------|--------------|-------------|--------------|--------------------|-----------|
| 1.  | <b>PTC-67</b>  | [Ti <sub>8</sub> O <sub>6</sub> (DMG) <sub>2</sub> (DPC)(O <sup>i</sup> Pr) <sub>14</sub> ] • (IPA) | <i>P2<sub>1</sub>/n</i>                         | 18.9555(7) | 12.7596(6) | 19.0307(6) | 90           | 91.243(4)   | 90           | 4601.8(3)          | None      |
| 2.  | <b>PTC-68A</b> | Ti <sub>9</sub> O <sub>8</sub> (DMG) <sub>3</sub> (DPC)(O <sup>i</sup> Pr) <sub>12</sub>            | <i>P2<sub>1</sub>2<sub>1</sub>2<sub>1</sub></i> | 13.686(2)  | 25.029(4)  | 25.781(5)  | 90           | 90          | 90           | 8831(3)            | 0.207(4)  |
| 3.  | <b>PTC-68B</b> | Ti <sub>9</sub> O <sub>8</sub> (DMG) <sub>3</sub> (DPC)(O <sup>i</sup> Pr) <sub>12</sub>            | <i>P2<sub>1</sub>2<sub>1</sub>2<sub>1</sub></i> | 13.4809(5) | 24.6175(6) | 25.6441(7) | 90           | 90          | 90           | 8510.4(4)          | -0.031(4) |
| 4.  | <b>PTC-68R</b> | Ti <sub>9</sub> O <sub>8</sub> (DMG) <sub>3</sub> (DPC)(O <sup>i</sup> Pr) <sub>12</sub>            | <i>P2<sub>1</sub>2<sub>1</sub>2<sub>1</sub></i> | 13.6676(2) | 25.0164(4) | 25.7877(3) | 90           | 90          | 90           | 8817.2(2)          | 0.093(9)  |
| 5.  | <b>PTC-69</b>  | Ti <sub>9</sub> O <sub>8</sub> (DMG) <sub>3</sub> (CHDC)(O <sup>i</sup> Pr) <sub>12</sub>           | <i>Pbca</i>                                     | 17.0355(4) | 19.0161(7) | 52.224(2)  | 90           | 90          | 90           | 16917.8(10)        | None      |
| 6.  | <b>PTC-70</b>  | Ti <sub>9</sub> O <sub>8</sub> (DMG) <sub>3</sub> (PAC)(O <sup>i</sup> Pr) <sub>12</sub>            | <i>P-1</i>                                      | 16.191(12) | 16.550(12) | 18.984(12) | 93.273(10)   | 95.531(6)   | 119.230(9)   | 4387(5))           | None      |

**Table S3.** Crystallographic data and structure refinement summary for **PTC-67** and **PTC-68**.

|                                                                                         | <b>PTC-67</b>                                                                   | <b>PTC-68A</b>                                                                  | <b>PTC-68B</b>                                                                  | <b>PTC-68R</b>                                                                  |
|-----------------------------------------------------------------------------------------|---------------------------------------------------------------------------------|---------------------------------------------------------------------------------|---------------------------------------------------------------------------------|---------------------------------------------------------------------------------|
| Empirical formula                                                                       | C <sub>67</sub> H <sub>126</sub> N <sub>4</sub> O <sub>29</sub> Ti <sub>8</sub> | C <sub>62</sub> H <sub>110</sub> N <sub>6</sub> O <sub>30</sub> Ti <sub>9</sub> | C <sub>62</sub> H <sub>110</sub> N <sub>6</sub> O <sub>30</sub> Ti <sub>9</sub> | C <sub>62</sub> H <sub>110</sub> N <sub>6</sub> O <sub>30</sub> Ti <sub>9</sub> |
| M <sub>r</sub>                                                                          | 1834.70                                                                         | 1850.65                                                                         | 1850.65                                                                         | 1850.65                                                                         |
| T/K                                                                                     | 293(2)                                                                          | 293(2)                                                                          | 100.0(3)                                                                        | 293(2)                                                                          |
| Crystal system                                                                          | Monoclinic                                                                      | Orthorhombic,                                                                   | Orthorhombic,                                                                   | Orthorhombic,                                                                   |
| Space group                                                                             | <i>P2<sub>1</sub>/n</i>                                                         | <i>P2<sub>1</sub>2<sub>1</sub>2<sub>1</sub></i>                                 | <i>P2<sub>1</sub>2<sub>1</sub>2<sub>1</sub></i>                                 | <i>P2<sub>1</sub>2<sub>1</sub>2<sub>1</sub></i>                                 |
| a/Å                                                                                     | 18.9555(7)                                                                      | 13.686(2)                                                                       | 13.4809(5)                                                                      | 13.6676(2)                                                                      |
| b/Å                                                                                     | 12.7596(6)                                                                      | 25.029(4)                                                                       | 24.6175(6)                                                                      | 25.0164(4)                                                                      |
| c/Å                                                                                     | 19.0307(6)                                                                      | 25.781(5)                                                                       | 25.6441(7)                                                                      | 25.7877(3)                                                                      |
| α (°)                                                                                   | 90                                                                              | 90                                                                              | 90                                                                              | 90                                                                              |
| β (°)                                                                                   | 91.243(4)                                                                       | 90                                                                              | 90                                                                              | 90                                                                              |
| γ (°)                                                                                   | 90                                                                              | 90                                                                              | 90                                                                              | 90                                                                              |
| V/Å <sup>3</sup>                                                                        | 4601.8(3)                                                                       | 8831(3)                                                                         | 8510.4(4)                                                                       | 8817.2(2)                                                                       |
| Z                                                                                       | 2                                                                               | 4                                                                               | 4                                                                               | 4                                                                               |
| Dc/mg m <sup>-3</sup>                                                                   | 1.281                                                                           | 1.392                                                                           | 1.444                                                                           | 1.394                                                                           |
| μ/mm <sup>-1</sup>                                                                      | 0.725                                                                           | 0.843                                                                           | 7.469                                                                           | 0.844                                                                           |
| indep reflns [ <i>I</i> > 2σ( <i>I</i> )]                                               | 8088                                                                            | 17301                                                                           | 16847                                                                           | 15338                                                                           |
| F(000)                                                                                  | 1860                                                                            | 3848                                                                            | 3848                                                                            | 3848                                                                            |
| GOF                                                                                     | 1.095                                                                           | 1.045                                                                           | 1.072                                                                           | 1.035                                                                           |
| CCDC No.                                                                                | 1973835                                                                         | 1973836                                                                         | 1973837                                                                         | 1973838                                                                         |
| R <sub>1</sub> <sup>a</sup> , wR <sub>2</sub> <sup>b</sup> [ <i>I</i> > 2σ( <i>I</i> )] | 0.0946, 0.2823                                                                  | 0.0618, 0.1646                                                                  | 0.0523, 0.1251                                                                  | 0.0486, 0.1283                                                                  |
| R <sub>1</sub> <sup>a</sup> , wR <sub>2</sub> <sup>b</sup> (all data)                   | 0.1116, 0.3003                                                                  | 0.0637, 0.1669                                                                  | 0.0651, 0.1370                                                                  | 0.0561, 0.1333                                                                  |

$$^a R_1 = \sum (| |F_o| | - |F_c| | ) / \sum |F_o|, \quad ^b wR_2 = [ \sum w (|F_o|^2 - |F_c|^2)^2 / \sum w (F_o^2) ]^{1/2}.$$

**Table S4.** Crystallographic data and structure refinement summary for **PTC-69** and **PTC-70**.

|                                                                                         | <b>PTC-69</b>                                                                   | <b>PTC-70</b>                                                                   |
|-----------------------------------------------------------------------------------------|---------------------------------------------------------------------------------|---------------------------------------------------------------------------------|
| Empirical formula                                                                       | C <sub>56</sub> H <sub>110</sub> N <sub>6</sub> O <sub>30</sub> Ti <sub>9</sub> | C <sub>56</sub> H <sub>106</sub> N <sub>6</sub> O <sub>30</sub> Ti <sub>9</sub> |
| M <sub>r</sub>                                                                          | 1778.30                                                                         | 1774.26                                                                         |
| T/K                                                                                     | 293(2)                                                                          | 293(2)                                                                          |
| Crystal system                                                                          | Orthorhombic                                                                    | Triclinic                                                                       |
| Space group                                                                             | <i>Pbca</i>                                                                     | <i>P</i> -1                                                                     |
| a/Å                                                                                     | 17.0355(4)                                                                      | 16.191(12)                                                                      |
| b/Å                                                                                     | 19.0161(7)                                                                      | 16.550(12)                                                                      |
| c/Å                                                                                     | 52.224(2)                                                                       | 18.984(12)                                                                      |
| α (°)                                                                                   | 90                                                                              | 93.273(10)                                                                      |
| β (°)                                                                                   | 90                                                                              | 95.531(6)                                                                       |
| γ (°)                                                                                   | 90                                                                              | 119.230(9)                                                                      |
| V/Å <sup>3</sup>                                                                        | 16917.8(10)                                                                     | 4387(5)                                                                         |
| Z                                                                                       | 8                                                                               | 2                                                                               |
| Dc/mg m <sup>-3</sup>                                                                   | 1.398                                                                           | 1.344                                                                           |
| μ/mm <sup>-1</sup>                                                                      | 0.877                                                                           | 0.845                                                                           |
| indep reflns [ <i>I</i> > 2σ( <i>I</i> )]                                               | 40891                                                                           | 15391                                                                           |
| F(000)                                                                                  | 7424                                                                            | 1844                                                                            |
| GOF                                                                                     | 1.042                                                                           | 1.083                                                                           |
| CCDC No.                                                                                | 1973839                                                                         | 1973840                                                                         |
| R <sub>1</sub> <sup>a</sup> , wR <sub>2</sub> <sup>b</sup> [ <i>I</i> > 2σ( <i>I</i> )] | 0.1088, 0.2903                                                                  | 0.1035, 0.2927                                                                  |
| R <sub>1</sub> <sup>a</sup> , wR <sub>2</sub> <sup>b</sup> (all data)                   | 0.1392, 0.3093                                                                  | 0.1258, 0.3141                                                                  |

$$^a R_1 = \sum (| |F_o| | - |F_c| | ) / \sum |F_o| . \quad ^b wR_2 = [ \sum w (|F_o|^2 - |F_c|^2)^2 / \sum w (F_o^2) ]^{1/2} .$$

## 6. References

- (1) W. W. Wendlandt, H. G. Hecht, *Reflectance Spectroscopy*. Interscience: New York, 1966; p593.
- (2) G. M. Sheldrick, *Acta Crystallogr., Sect. C: Struct. Chem.*, 2015, **71**, 3.
